# Supplementary material for: Gravity change differentially affects male and female cognition and anxiety-related parameters in mice
Source: Research Square preprint supplement (doi:10.21203/rs.3.rs-6861935/v1), 2025-06-25

**Supplementary data Figure S.1**: Sex-dependent actimetry activity of mice obtained by number of cross of infrared beams during 24h. **A**. Bar graphs with mean ± SEM comparing the numbers of infrared beams crossed horizontally from control (n=7), 24h (n=7), 48h (n=7) and 15d HG exposed (n=7) male mice. **B**. Bar graphs with mean ± SEM comparing the numbers of infrared beams crossed horizontally from control (n=7), 24h (n=7), 48h (n=7) and 15d HG exposed (n=7) female mice. **C**. Bar graphs with mean ± SEM comparing the numbers of infrared beams crossed vertically from control (n=7), 24h (n=7), 48h (n=7) and 15d HG exposed (n=7) male mice (* P<0.05, *** P<0.001). **D**. Bar graphs with mean ± SEM comparing the numbers of infrared beams crossed vertically from control (n=7), 24h (n=7), 48h (n=7) and 15d HG exposed (n=7) female mice (* P<0.05, *** P<0.001).


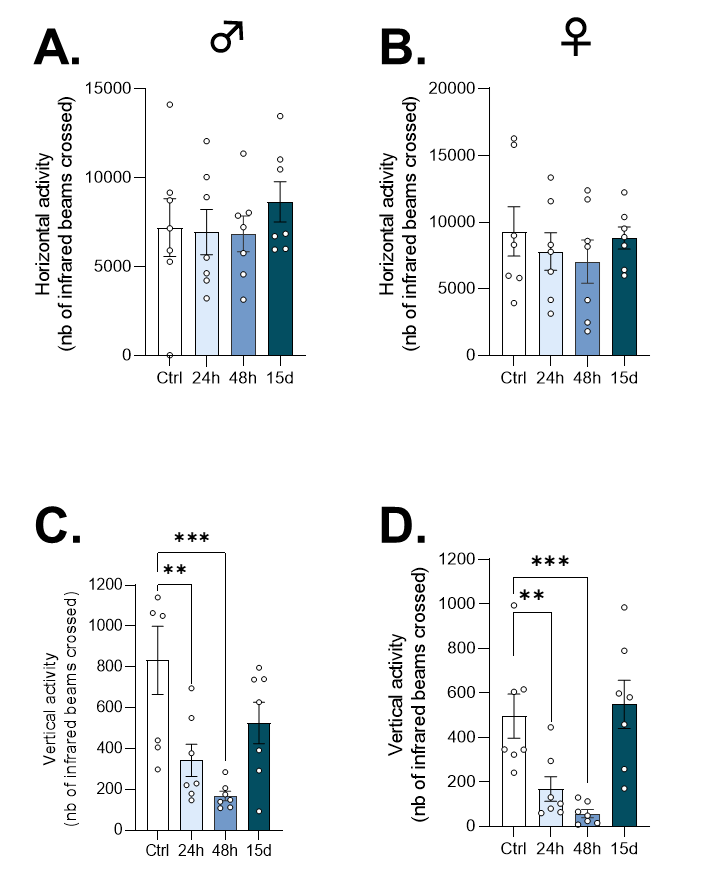

Supplement: Supplementary file 1 [file a2d27aed4628ab3e4185a1b2.docx]
